# Supplementary material
Source: MDPI journal article supplement (https://www.mdpi.com/2073-4344/9/11/958)
Supplement: s1 [file s1]

# **Highly selective pH dependent ozonation of cyclohexane over Mn/ $\gamma$ -Al<sub>2</sub>O<sub>3</sub> catalysts at ambient reaction conditions**

**Mkhondwane S.T and Pullabhotla V.S.R. Rajasekhar \***

Department of Chemistry, University of Zululand, Private Bag X1001, Kwa-Dlangezwa,  
3886, South Africa.

---

\*Corresponding author: Prof. V.S.R. Rajasekhar Pullabhotla

Email: PullabhotlaV@unizulu.ac.za; Ph: + 27 35 902 6155; Fax: + 27 35 902 6568

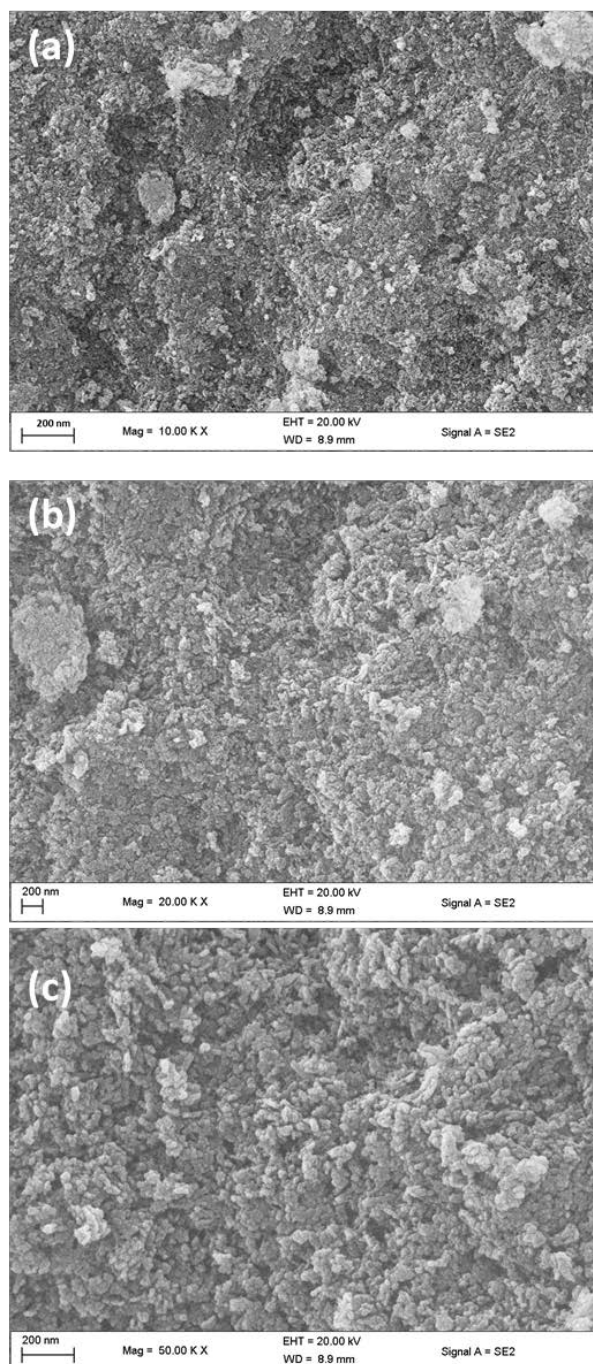

**Figure S1.** SEM images of (a) 10% Mn/γ-Al<sub>2</sub>O<sub>3</sub>, (b) 12.5% Mn/γ-Al<sub>2</sub>O<sub>3</sub> and (c) 15% Mn/γ-Al<sub>2</sub>O<sub>3</sub> catalysts.

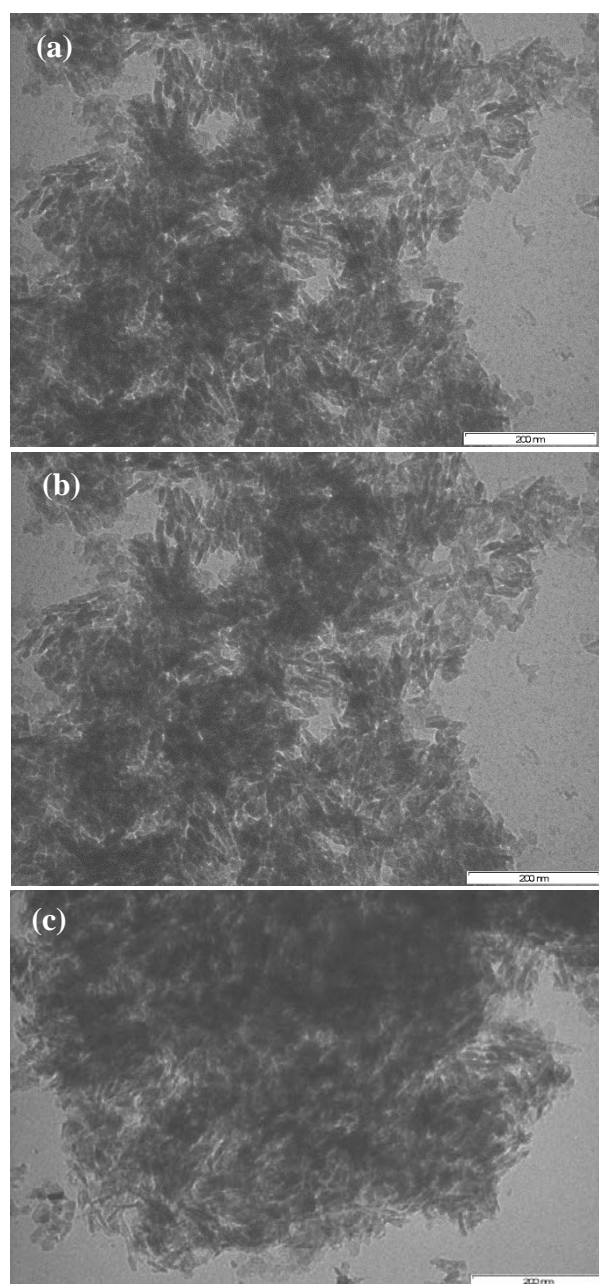

**Figure S2.** TEM images of (a) 10% Mn/ $\gamma$ -Al<sub>2</sub>O<sub>3</sub>, (b) 12.5% Mn/ $\gamma$ -Al<sub>2</sub>O<sub>3</sub> and (c) 15% Mn/ $\gamma$ -Al<sub>2</sub>O<sub>3</sub> catalysts.

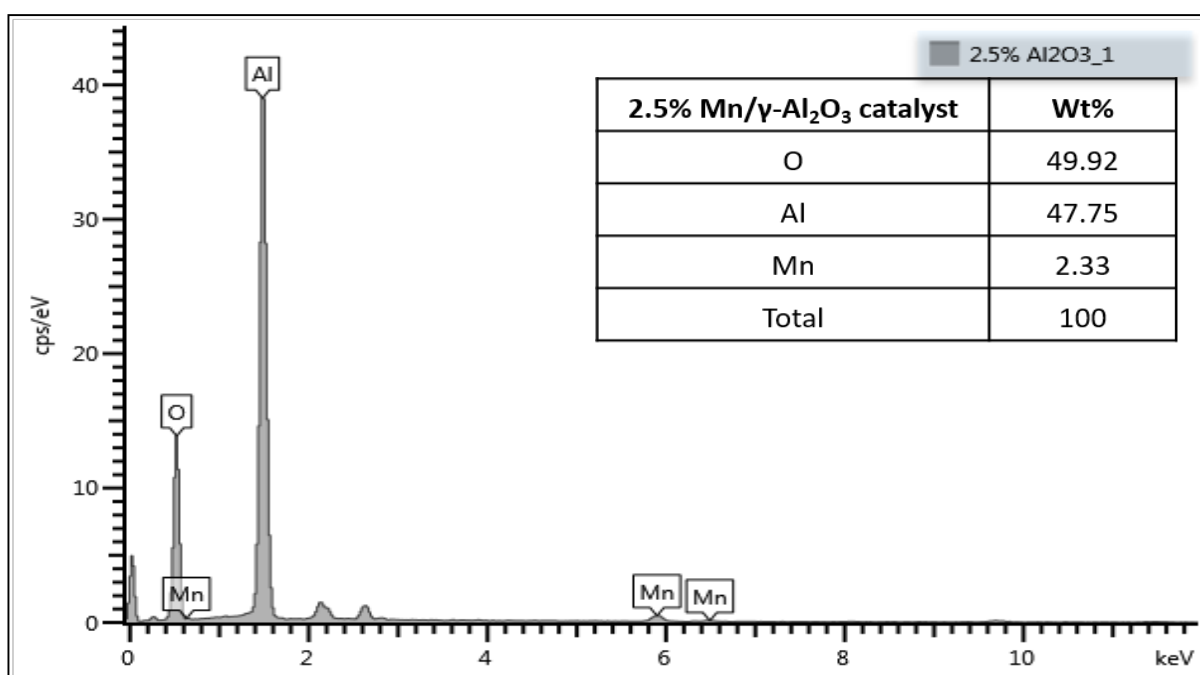

**Figure S3 (a).** SEM-EDX image for 2.5% Mn/γ-Al<sub>2</sub>O<sub>3</sub> catalyst.

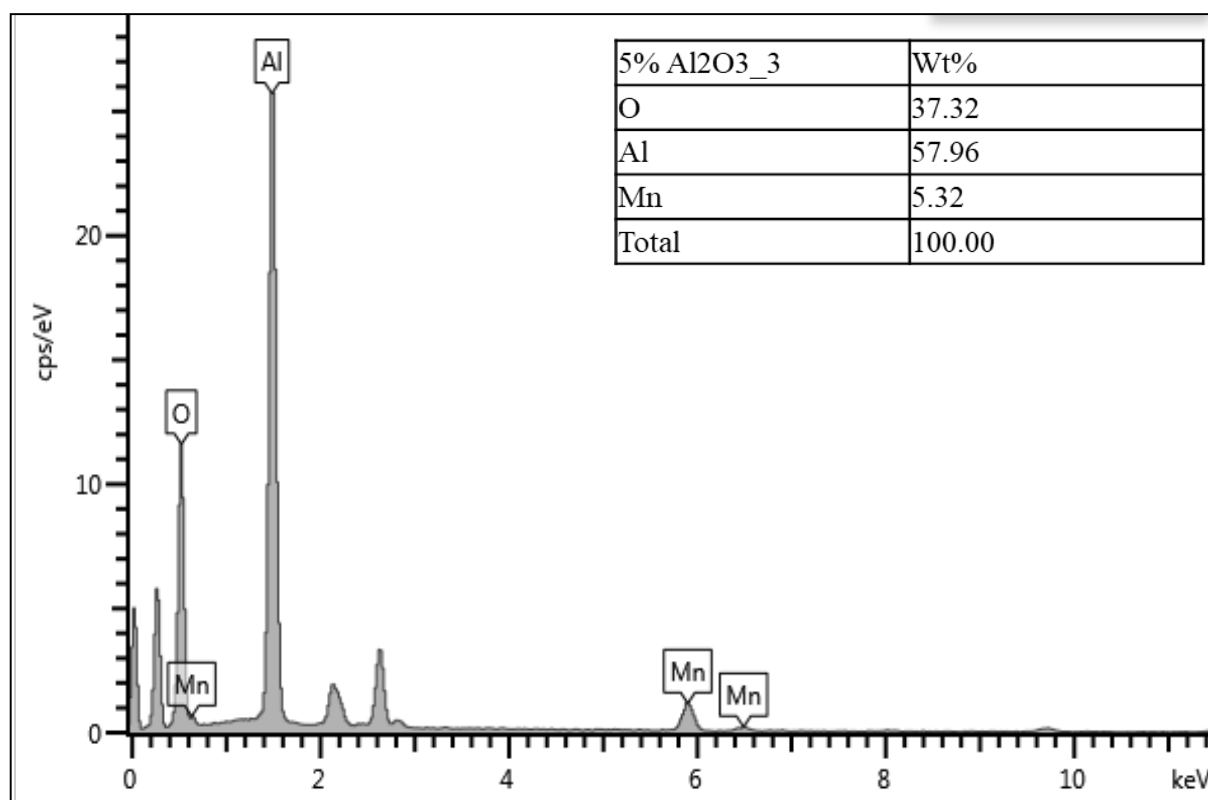

**Figure S3 (b).** SEM-EDX image for 5 % Mn/γ-Al<sub>2</sub>O<sub>3</sub> catalyst.

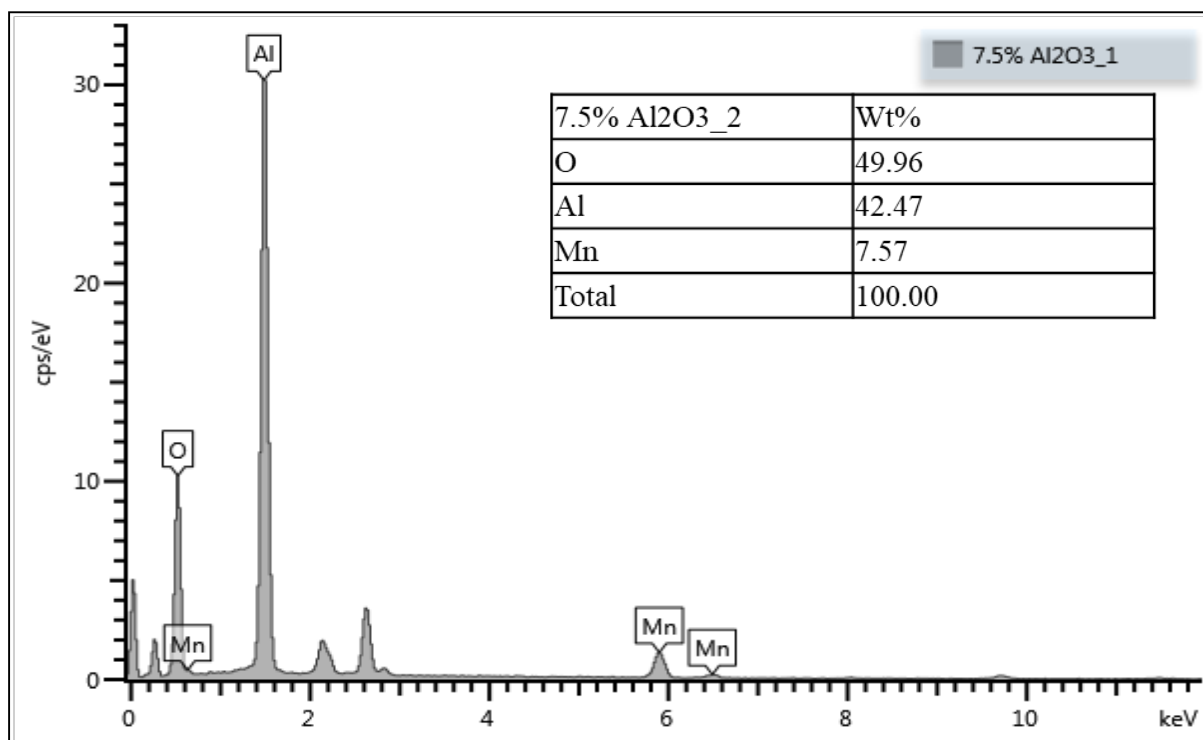

**Figure S3 (c).** SEM-EDX image for 7.5 % Mn/ $\gamma$ -Al<sub>2</sub>O<sub>3</sub> catalyst.

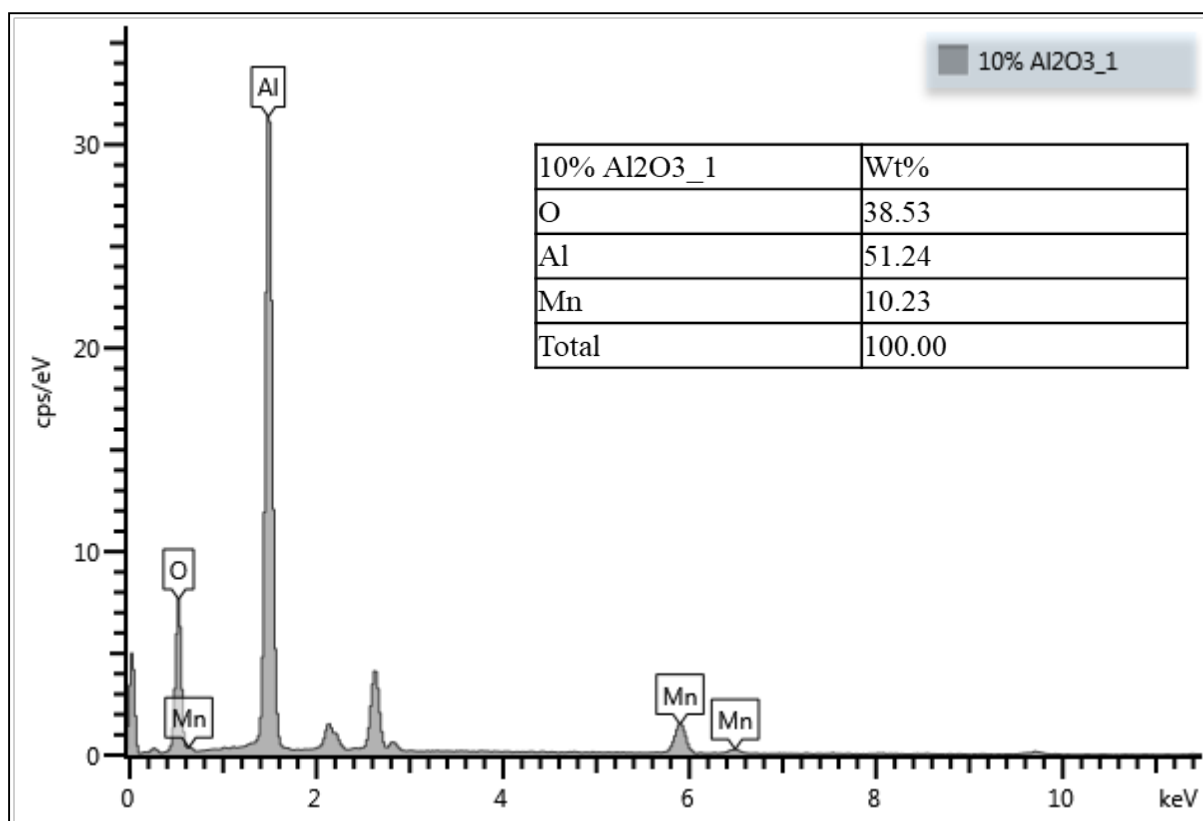

**Figure S3 (d).** SEM-EDX image for 10 % Mn/ $\gamma$ -Al<sub>2</sub>O<sub>3</sub> catalyst.

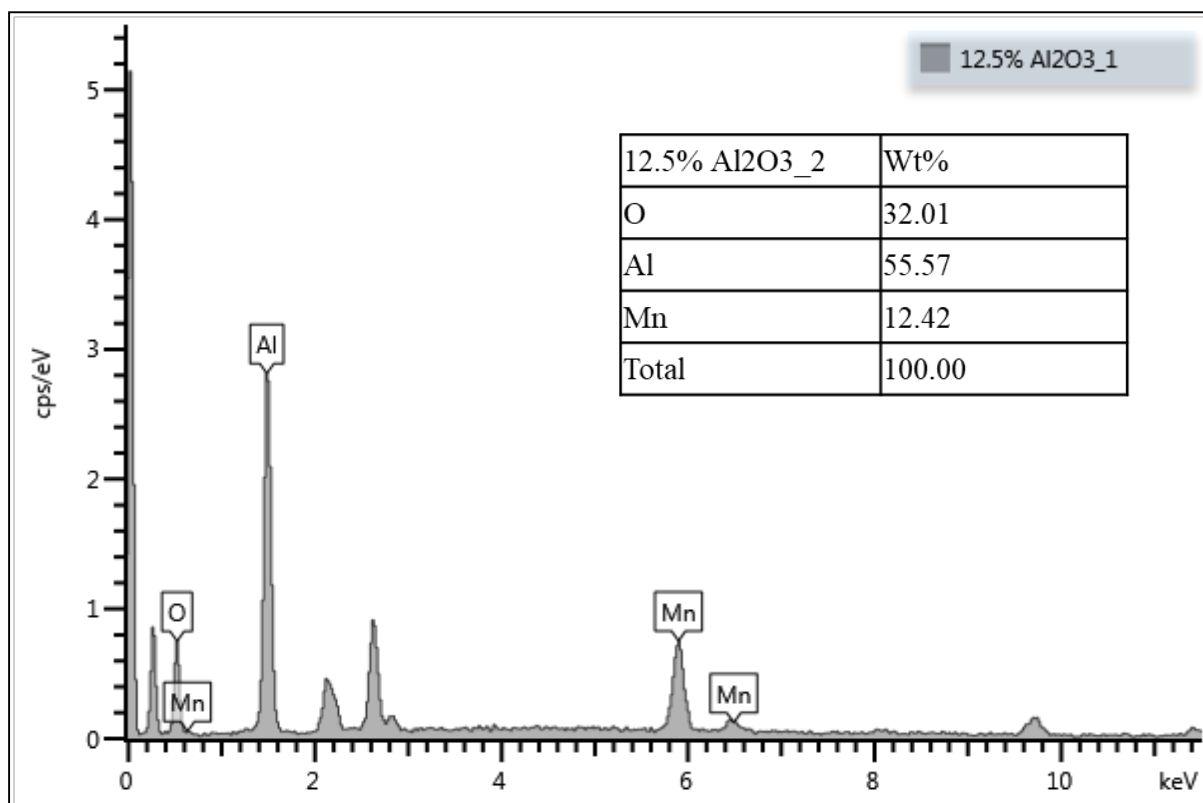

**Figure S3 (e).** SEM-EDX image for 12.5 % Mn/γ-Al<sub>2</sub>O<sub>3</sub> catalyst.

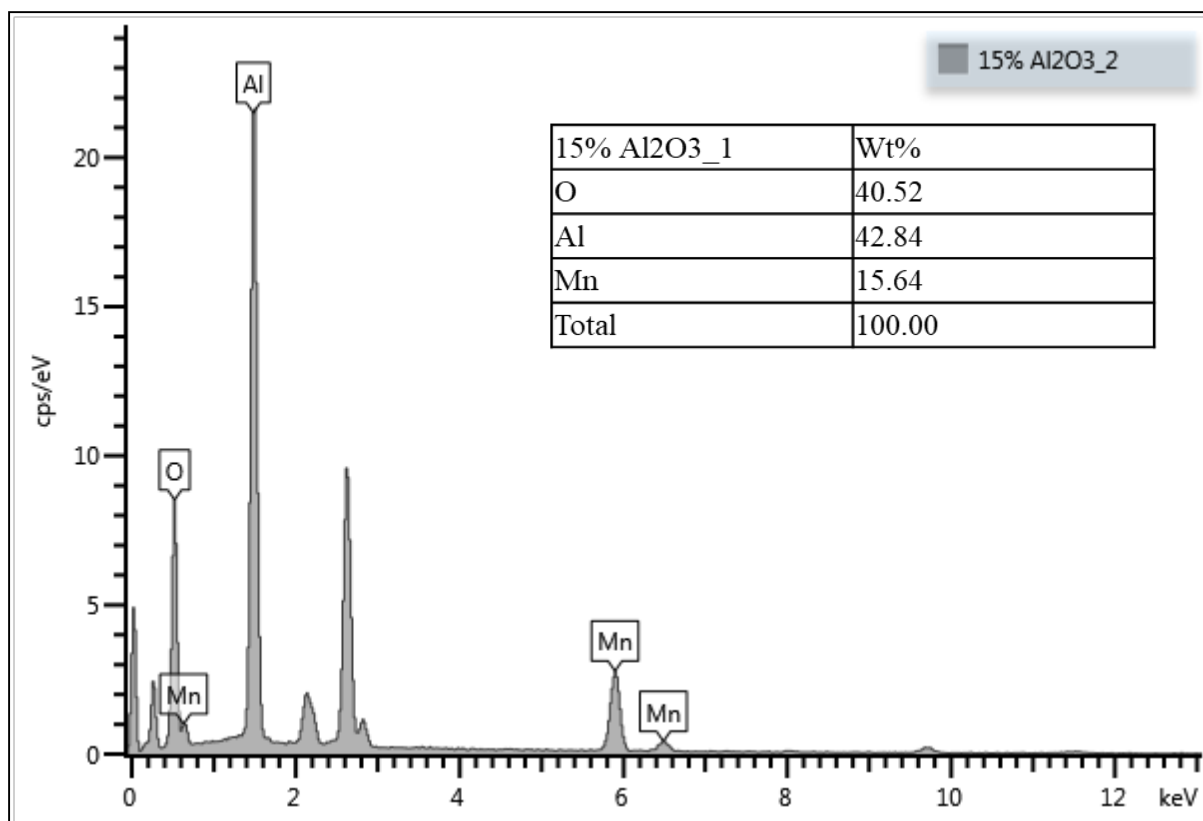

**Figure S3 (f).** SEM-EDX image for 15% Mn/γ-Al<sub>2</sub>O<sub>3</sub> catalyst.

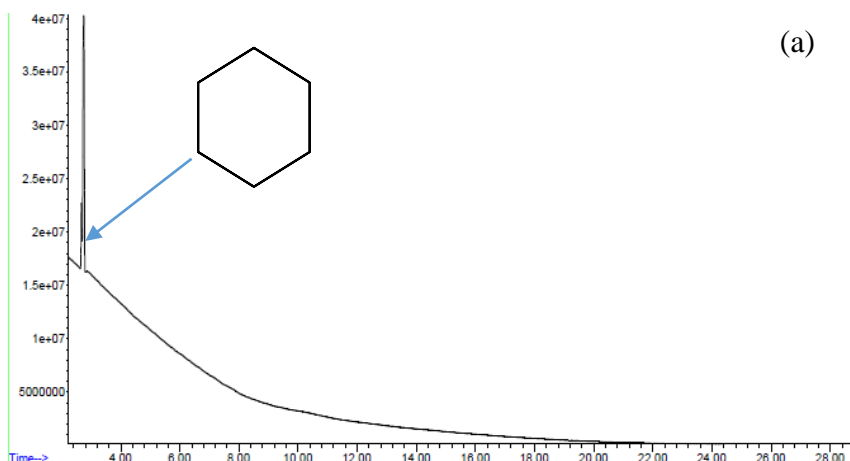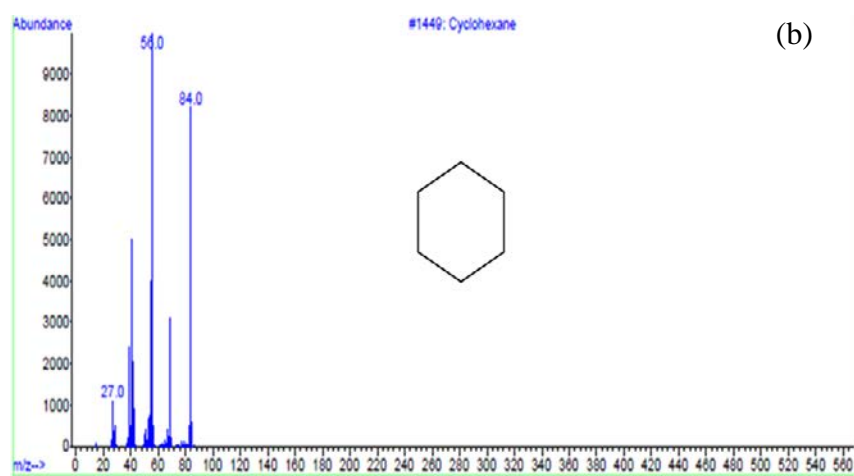

**Figure S4.** (a) Gas chromatogram and (b) mass spectrum of cyclohexane before ozonation.

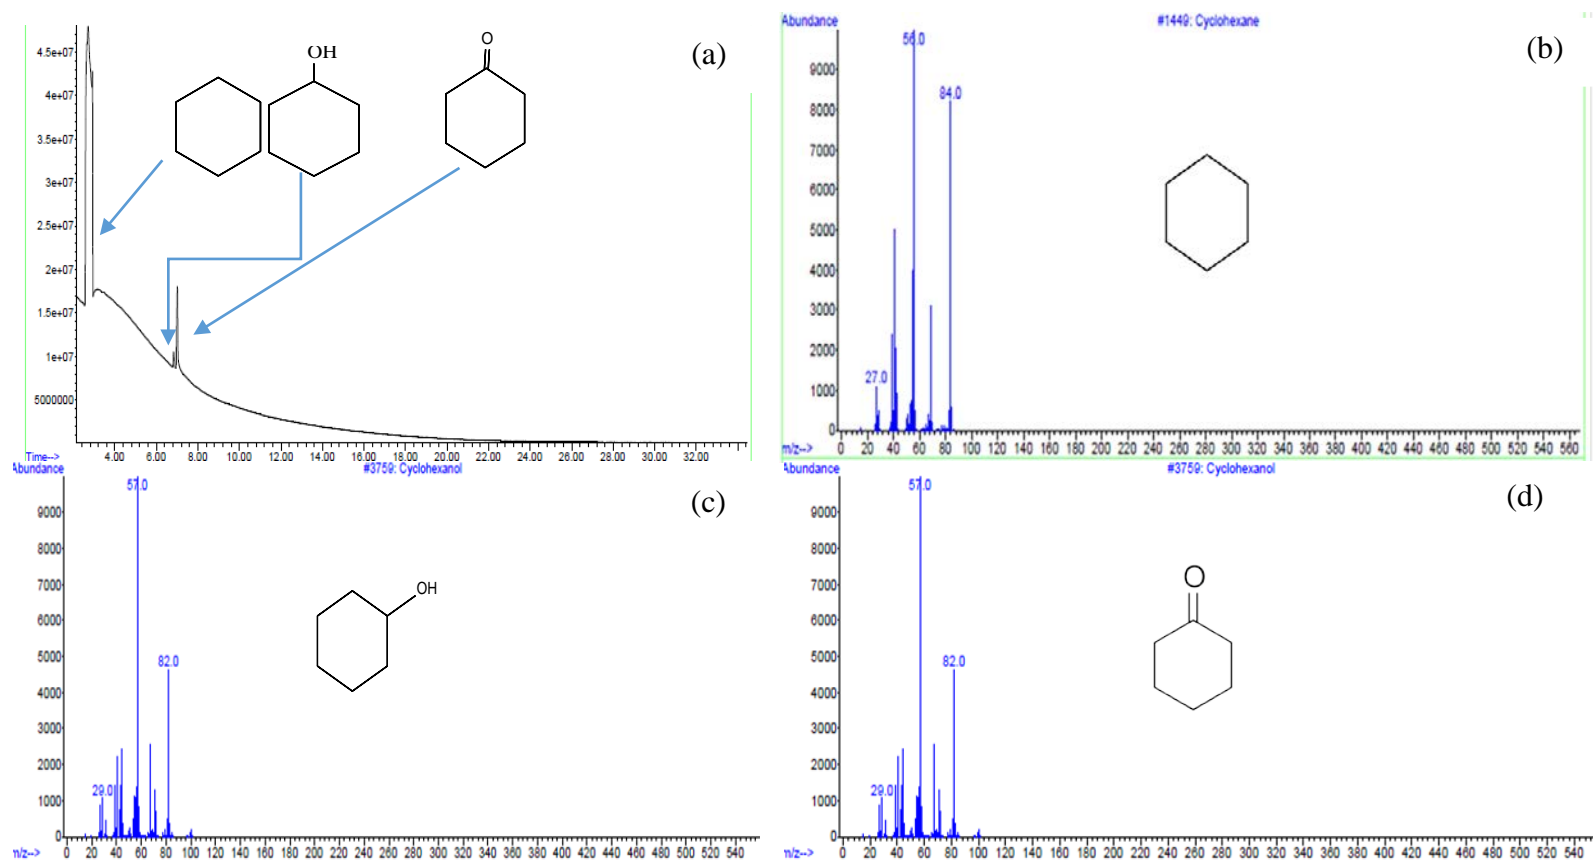

**Figure S5.** (a) Gas chromatogram and mass spectra of (b) cyclohexane (c) cyclohexanol and (d) cyclohexanone after 30 minutes of ozonation using 2.5% Mn/ $\gamma$ -Al<sub>2</sub>O<sub>3</sub> catalyst at pH 3.



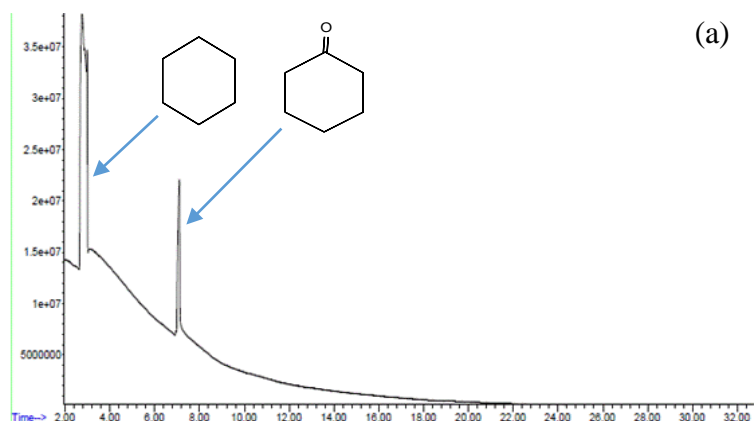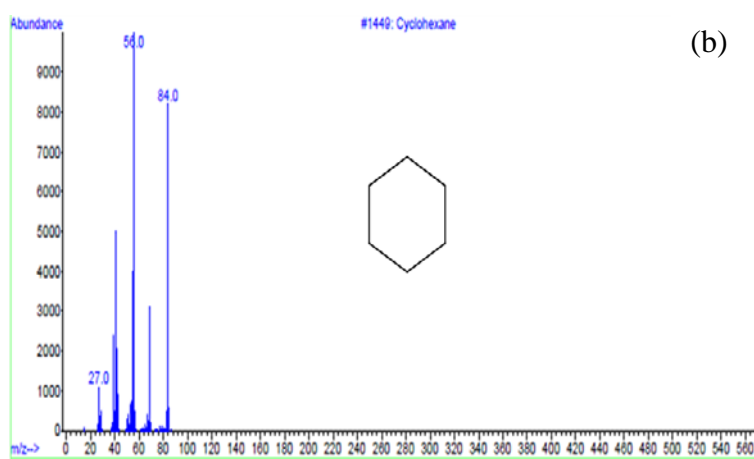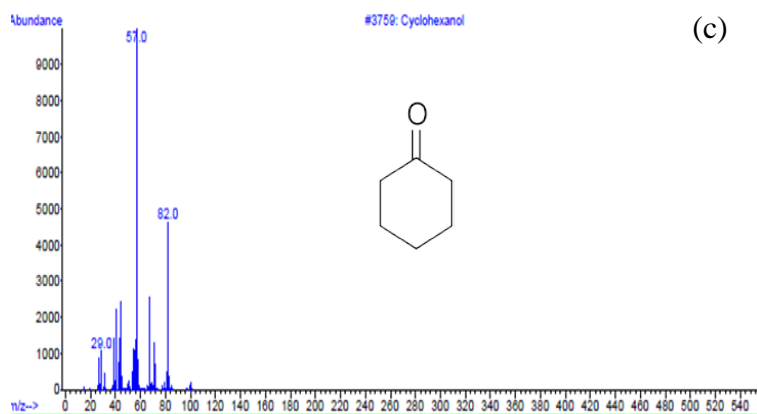

**Figure S6.** (a) Gas chromatogram and mass spectra of (b) cyclohexane and (c) cyclohexanone after 1 hour of ozonation using 2.5% Mn/ $\gamma$ -Al<sub>2</sub>O<sub>3</sub> catalyst at pH 3.
